# Supplementary material
Source: HighWire-hosted journal article supplement (http://jpet.aspetjournals.org/highwire/filestream/151361/field_highwire_adjunct_files/0/1278_supp_fig.pdf)
Supplement: 1278_supp_fig.pdf [file 1278_supp_fig.pdf]

Antinociceptive and analgesic effects of (2R,6R)-hydroxynorketamine

Jonathan G. Yost, Hildegard A. Wulf, Caroline A. Browne, Irwin Lucki

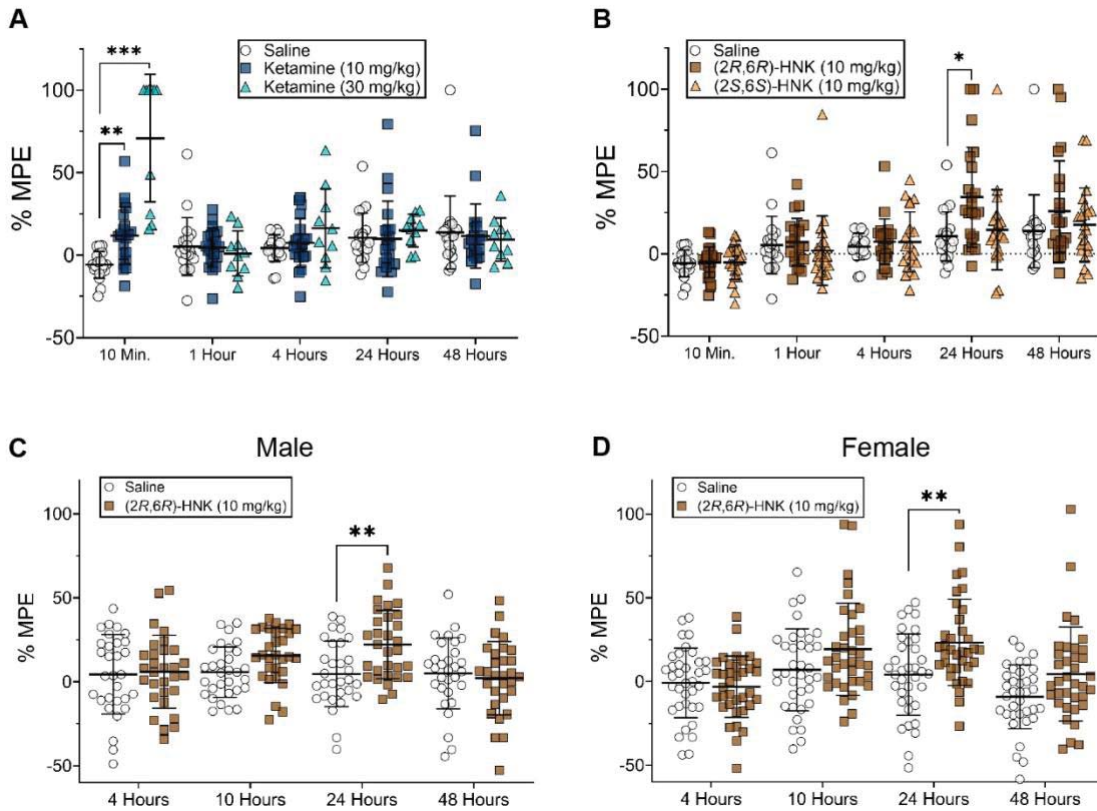

**Supplementary Figure.** Data from Figures 1 & 2 displayed as percentage of maximum possible effect (%MPE), calculated according to the following equation:  $\%MPE = [(latency - baseline\ latency) / (cut\ off\ time - baseline\ latency)] \times 100$ . **Panel A:** Ketamine antinociception as %MPE. **Panel B:** (2R,6R)-HNK and (2S,6S)-HNK antinociception as %MPE. (2R,6R)-HNK antinociception in male mice (**Panel C**) compared to that of female mice (**Panel D**) expressed as %MPE. Results of the two-way ANOVA for panels A & B are as follows: Treatment –  $F(4, 90) =$

4.606,  $P = 0.0020$ . Time –  $F(3.6, 321.9) = 8.378$ ,  $P < 0.0001$ . Time x Treatment –  $F(16, 360) = 10.96$ ,  $P < 0.0001$ . Results of the two-way ANOVA for male mice are as follows: Treatment –  $F(1, 58) = 3.121$ ,  $P = 0.0825$ . Time –  $F(2.9, 168.3) = 4.779$ ,  $P = 0.0035$ . Time x Treatment –  $F(3, 174) = 4.499$ ,  $P = 0.0046$ . Results of the two-way ANOVA for female mice are as follows: Treatment –  $F(1, 70) = 8.886$ ,  $P = 0.0039$ . Time –  $F(2.7, 188.4) = 13.07$ ,  $P < 0.0001$ . Time x Treatment –  $F(3, 210) = 3.381$ ,  $P = 0.0192$ .
